# Supplementary material for: Mitochondrial genomics of human pathogenic parasite Leishmania (Viannia) panamensis
Source: PeerJ. 2019 Jul 2;7:e7235. doi: 10.7717/peerj.7235 (PMC6611448; doi:10.7717/peerj.7235)
Supplement: File S2 [file peerj-07-7235-s002.xlsx]

## Sheet: out_indels
Mitochondrial genomics of human pathogenic parasite Leishmania (V) panamensis
Supplementary file 2. Indels calling of L. panamensis maxicircle
#CHROM	POS	REF	ALT	QUAL	L13	PSC1	UA1114	UA140	UA1511	UA946	WR120
Lpan_kDNA_Maxicircle	164	T	TA	1957.31	./.	0/0	0/1	0/1	0/1	0/0	0/1
Lpan_kDNA_Maxicircle	199	T	TTTA	3843.61	./.	0/1	0/0	0/1	0/0	0/1	0/1
Lpan_kDNA_Maxicircle	226	A	ATT,AT	5115.73	./.	1/2:	0/0	0/0	0/0	0/0	0/0
Lpan_kDNA_Maxicircle	247	T	TG	22757.98	./.	1/1:	0/1	0/1	1/1:	0/1	0/1
Lpan_kDNA_Maxicircle	275	T	TA	493.79	./.	0/1	0/0	0/0	0/0	0/0	0/1
Lpan_kDNA_Maxicircle	296	TG	T	1093.11	./.	0/1	0/0	0/0	0/0	0/0	0/0
Lpan_kDNA_Maxicircle	297	G	GA	123.11	./.	0/0	0/0	0/0	0/1	0/0	0/0
Lpan_kDNA_Maxicircle	324	T	TA	1235.11	./.	0/1	0/0	0/0	0/0	0/0	0/0
Lpan_kDNA_Maxicircle	374	ATAAAAT	A	4062.70	./.	1/1:	0/0	0/0	0/0	0/0	0/0
Lpan_kDNA_Maxicircle	410	A	AT	7270.70	./.	1/1:	0/0	0/0	0/0	0/0	0/0
Lpan_kDNA_Maxicircle	437	AT	A	517.21	./.	0/0	0/0	0/1	0/0	0/0	0/0
Lpan_kDNA_Maxicircle	814	TA	T	9570.91	1/1:	1/1:	0/0	0/0	0/0	0/0	0/0
Lpan_kDNA_Maxicircle	1000	GTTA	G	12515.51	./.	1/1:	0/0	0/0	0/0	0/0	0/0
Lpan_kDNA_Maxicircle	2927	TA	T	1133.09	1/1:	1/1:	0/0	0/0	0/0	0/0	0/0
Lpan_kDNA_Maxicircle	2954	AAT	A	12321.50	0/0	1/1:	0/0	0/0	0/0	0/0	0/0
Lpan_kDNA_Maxicircle	2975	GT	G	510.50	1/1:	0/0	0/0	0/0	0/0	0/0	0/0
Lpan_kDNA_Maxicircle	2994	A	AT	552.50	1/1:	0/0	0/0	0/0	0/0	0/0	0/0
5'-ND8
Lpan_kDNA_Maxicircle	3037	ATT	A	555.51	1/1:	0/0	0/0	0/0	0/0	0/0	0/0
Lpan_kDNA_Maxicircle	3046	A	AT	667.50	1/1:	0/0	0/0	0/0	0/0	0/0	0/0
Lpan_kDNA_Maxicircle	3192	GT	G	727.50	1/1:	0/0	0/0	0/0	0/0	0/0	0/0
Lpan_kDNA_Maxicircle	3222	A	ATT,AT	11267.09	2/2:	1/1:	0/0	0/0	0/0	0/0	0/0
ND8-3'
Lpan_kDNA_Maxicircle	3249	AT	A	350.53	1/1:	0/0	0/0	0/0	0/0	0/0	0/0
Lpan_kDNA_Maxicircle	3271	CAATTAAA	C	662.72	1/1:	0/0	0/0	0/0	0/0	0/0	0/0
Lpan_kDNA_Maxicircle	3313	T	TA	395.52	1/1:	0/0	0/0	0/0	0/0	0/0	0/0
Lpan_kDNA_Maxicircle	3347	G	GA	386.51	1/1:	0/0	0/0	0/0	0/0	0/0	0/0
3'-ND9
Lpan_kDNA_Maxicircle	3485	TA	T	328.61	1/1:	0/0	0/0	0/0	0/0	0/0	0/0
Lpan_kDNA_Maxicircle	3507	T	TA	241.93	1/1:	0/0	0/0	0/0	0/0	0/0	0/0
Lpan_kDNA_Maxicircle	3576	C	CAAA	260	1/1:	0/0	0/0	0/0	0/0	0/0	0/0
ND9-5'
Lpan_kDNA_Maxicircle	5084	AT	A	1427.50	1/1:	0/0	0/0	0/0	0/0	0/0	0/0
Lpan_kDNA_Maxicircle	5095	T	TC	1624.50	1/1:	0/0	0/0	0/0	0/0	0/0	0/0
Lpan_kDNA_Maxicircle	5113	TA	T	1400.50	1/1:	0/0	0/0	0/0	0/0	0/0	0/0
5'-COIII
Lpan_kDNA_Maxicircle	5156	AT	A	1022.50	1/1:	0/0	0/0	0/0	0/0	0/0	0/0
3'-COIII
Lpan_kDNA_Maxicircle	6005	A	AT	393.52	1/1:	0/0	0/0	0/0	0/0	0/0	0/0
Lpan_kDNA_Maxicircle	7131	A	AT	10872.09	1/1:	1/1:	0/0	0/0	0/0	0/0	0/0
5'-MURF2
Lpan_kDNA_Maxicircle	10795	A	ATCTAT	831.53	1/1:	0/0	0/0	0/0	0/0	0/0	0/0
Lpan_kDNA_Maxicircle	11609	TA	T	34063.09	1/1:	1/1:	1/1:	1/1:	1/1:	1/1:	1/1:
MURF2-3'
5'-G4
Lpan_kDNA_Maxicircle	13570	CA	C	22511.32	1/1:	1/1:	0/0	1/1:	1/1:	0/0	0/0
Lpan_kDNA_Maxicircle	13631	CA	C	1642.50	1/1:	0/0	0/0	0/0	0/0	0/0	0/0
G4-3'
3'-ND3
Lpan_kDNA_Maxicircle	15147	CA	C	1043.50	1/1:	0/0	0/0	0/0	0/0	0/0	0/0
ND3-5'
5'-RPS12
Lpan_kDNA_Maxicircle	15406	TTG	T	59120.09	1/1:	1/1:	1/1:	1/1:	1/1:	1/1:	1/1:
Lpan_kDNA_Maxicircle	15435	TTG	T	54301.09	1/1:	1/1:	1/1:	1/1:	1/1:	1/1:	1/1:
RPS12-3'
5'-ND5
Lpan_kDNA_Maxicircle	15535	G	GT	33977.10	1/1:	1/1:	1/1:	1/1:	1/1:	1/1:	1/1:
Lpan_kDNA_Maxicircle	15538	T	TTTA	29115.22	1/1:	1/1:	1/1:	1/1:	1/1:	1/1:	1/1:
Lpan_kDNA_Maxicircle	15540	A	ATT	37353.10	1/1:	1/1:	1/1:	1/1:	1/1:	1/1:	1/1:
Lpan_kDNA_Maxicircle	15548	A	AT	36350.10	1/1:	1/1:	1/1:	1/1:	1/1:	1/1:	1/1:
Lpan_kDNA_Maxicircle	15551	T	TTA	26503.10	1/1:	1/1:	1/1:	1/1:	1/1:	1/1:	1/1:
Lpan_kDNA_Maxicircle	15552	A	AT	32962.10	1/1:	1/1:	1/1:	1/1:	1/1:	1/1:	1/1:
Lpan_kDNA_Maxicircle	16551	GT	G	36204.09	1/1:	1/1:	1/1:	1/1:	1/1:	1/1:	1/1:
Lpan_kDNA_Maxicircle	16571	A	AT	28157.09	1/1:	1/1:	1/1:	1/1:	1/1:	1/1:	1/1:
Lpan_kDNA_Maxicircle	17026	A	AT	10353.50	0/0	1/1:	0/0	0/0	0/0	0/0	0/0
ND5-3'
Lpan_kDNA_Maxicircle	17409	TA	T	31236.14	1/1:	1/1:	1/1:	1/1:	1/1:	1/1:	1/1:
Lpan_kDNA_Maxicircle	17478	T	TTTA	24235.52	./.	0/1	1/1:	0/1	0/1	0/1	0/1
Lpan_kDNA_Maxicircle	17812	A	AT	9262.32	./.	1/1:	0/0	1/1:	1/1:	0/0	0/0
Lpan_kDNA_Maxicircle	17816	T	TC	3562.95	./.	0/0	0/0	1/1:	1/1:	0/0	0/0
Lpan_kDNA_Maxicircle	17836	A	AT	9316.70	./.	1/1:	0/0	0/0	0/0	0/0	0/0
Lpan_kDNA_Maxicircle	17861	TATTTTTAACA	T	9367.94	./.	0/0	0/0	1/1:	1/1:	0/0	0/0
Lpan_kDNA_Maxicircle	18026	G	GT	6044.69	./.	1/1:	0/0	0/0	0/0	0/0	0/0
Lpan_kDNA_Maxicircle	18065	G	GA	1503.69	./.	1/1:	0/0	0/0	0/0	0/0	0/0
Lpan_kDNA_Maxicircle	18078	AT	A	830.70	./.	1/1:	0/0	0/0	0/0	0/0	0/0
Lpan_kDNA_Maxicircle	18108	AT	A	150.11	./.	0/1	0/0	0/0	0/0	0/0	0/0
Lpan_kDNA_Maxicircle	18227	A	ATTT	770	./.	1/1:	0/0	0/1	1/1:	0/0	0/0
Lpan_kDNA_Maxicircle	18330	CT	C	9420.44	./.	0/0	1/1:	1/1:	./.	1/1:	1/1:
Lpan_kDNA_Maxicircle	18432	A	AT	691.70	./.	1/1:	0/0	0/0	0/0	0/0	0/0
Lpan_kDNA_Maxicircle	18451	AT	A	2747.26	./.	1/1:	0/0	1/1:	1/1:	0/0	0/0
Lpan_kDNA_Maxicircle	18526	A	AC	3992.80	./.	1/1:	0/0	0/0	0/0	0/0	0/0
Lpan_kDNA_Maxicircle	18532	T	TC	5961.25	./.	1/1:	0/0	1/1:	1/1:	0/0	0/0
Lpan_kDNA_Maxicircle	18540	TC	T	7736.25	./.	1/1:	0/0	1/1:	1/1:	0/0	0/0
Lpan_kDNA_Maxicircle	18610	AT	A	1003.14	./.	0/0	0/0	1/1:	1/1:	0/0	0/0
Lpan_kDNA_Maxicircle	18738	A	AT	958.69	./.	1/1:	0/0	0/0	0/0	0/0	0/0
Lpan_kDNA_Maxicircle	18810	T	TA	1773.69	./.	1/1:	0/0	0/0	0/0	0/0	0/0
Lpan_kDNA_Maxicircle	18863	T	TG	1653.52	./.	1/1:	0/0	1/1:	1/1:	0/0	0/0
Lpan_kDNA_Maxicircle	19027	TG	T	771.96	./.	./.	0/1	0/0	0/0	0/1	0/1
Lpan_kDNA_Maxicircle	19233	T	TC	9448.29	./.	0/1	0/1	0/1	0/1	0/1	0/1
Lpan_kDNA_Maxicircle	19282	A	ATT	1854.56	./.	0/0	0/1	0/1	0/1	0/0	0/1
Lpan_kDNA_Maxicircle	19294	TA	T	589.48	./.	1/1:	0/0	0/1	0/0	0/0	0/0
Lpan_kDNA_Maxicircle	19310	A	AAAT	1198.13	./.	1/1:	0/0	0/1	0/1	0/0	0/0
0/0 - the sample is homozygous reference
0/1 - the sample is heterozygous, carrying 1 copy of each of the REF and ALT alleles
1/1 - the sample is homozygous alternate
